# Supplementary material
Source: PubMed Central journal article supplement (PMC7984853)

**Supporting Information: Research Article Rating Scale (RARS)**

Article Title:

Authors:

Year:

Journal:

| Description of Participants and Setting (PS)                                                                                                                                                             | Yes                                           | No                                   | Comments |
|----------------------------------------------------------------------------------------------------------------------------------------------------------------------------------------------------------|-----------------------------------------------|--------------------------------------|----------|
| 1. Participant and presenting problem behavior are described with sufficient detail to allow others to select individuals with similar characteristics (e.g., age, gender, diagnosis, problem behavior). |                                               |                                      |          |
| 2. Critical features of the physical setting are described with sufficient precision to allow replication.                                                                                               |                                               |                                      |          |
| 3. Dependent Variables are described with operational precision.                                                                                                                                         |                                               |                                      |          |
| <b>Dependent Variable (DV)</b>                                                                                                                                                                           |                                               |                                      |          |
| 1. Each DV is measured with a procedure that generates a quantifiable index (e.g., rate, duration, frequency, etc.).                                                                                     |                                               |                                      |          |
| 2. DVs are measured repeatedly over time.                                                                                                                                                                |                                               |                                      |          |
| 3. Data are collected on the reliability of IOA associated with each DV in 25% of sessions, and IOA meets minimal standards (80%).                                                                       |                                               |                                      |          |
| <b>Functional Analysis (FA)</b>                                                                                                                                                                          |                                               |                                      |          |
| 1. Was an FA conducted?                                                                                                                                                                                  |                                               |                                      |          |
| 2. Did the FA include a Control and an Alone or Ignore condition?                                                                                                                                        |                                               |                                      |          |
| 3. Were <u>at least</u> three series conducted of the relevant test and control conditions?                                                                                                              |                                               |                                      |          |
| <b>Experimental Control Grading (EC)</b>                                                                                                                                                                 |                                               |                                      |          |
| 1. BL data is stable.                                                                                                                                                                                    |                                               |                                      |          |
| 2. Describe experimental design.                                                                                                                                                                         | <i>(e.g. AB, Reversal, Multiple-baseline)</i> |                                      |          |
| 3. Grade level change using the criteria described in <i>Appendix A</i> .                                                                                                                                | <i>(e.g. Strong, Moderate, Weak)</i>          | See Appendix for criteria & examples |          |
| <b>Baseline and Evaluation of Treatment (BT)</b>                                                                                                                                                         |                                               |                                      |          |
| 1. BL conditions are described with replicable precision.                                                                                                                                                |                                               |                                      |          |
| 2. Treatment is described with replicable precision.                                                                                                                                                     |                                               |                                      |          |
| 3. Independent variable is under the control of experimenter.                                                                                                                                            |                                               |                                      |          |

## Appendix A

### Experimental Control Grading

#### **Question 1 - Baseline Stability:**

- Were baseline rates of responding stable or ascending prior to application of the independent variable?

#### **Question 2 – Completeness of Experimental Design:**

- Did the order of conditions and design of experiment allow for a believable demonstration of control?
- Complete design = 1.0: ABAB, multielement with control condition, or multiple baseline.
- Partial design = 0.5: ABA or BAB.
- Incomplete design = 0: AB or multielement without control condition.

#### **Question 3 – Level Change:**

- Strong change = 1.0: Robust differences in level between conditions, baseline rates were recaptured; fewer than 25% of data points in baseline and treatment were overlapping.
- Moderate change = 0.5: Moderate differences in level between conditions; baseline rates not recaptured; between 25-50% of data points in baseline and treatment were overlapping.
- Weak change = 0: Small differences in level between conditions; greater than 50% of data points in baseline and treatment were overlapping.

#### **Strong Control Examples:**

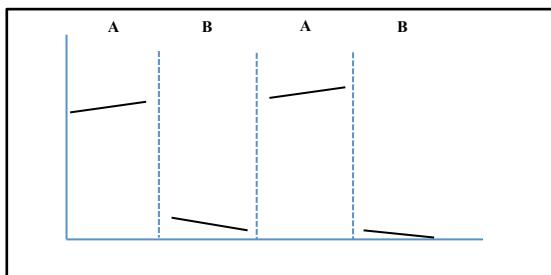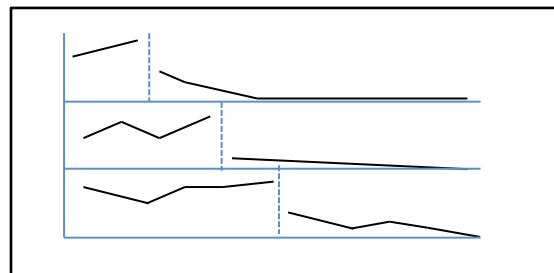

#### **Moderate Control Examples:**

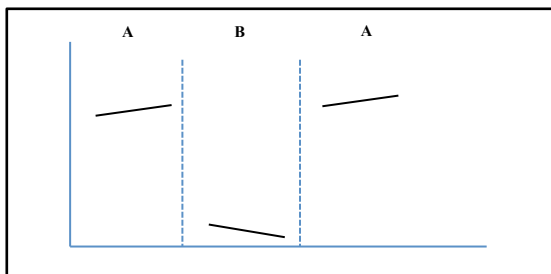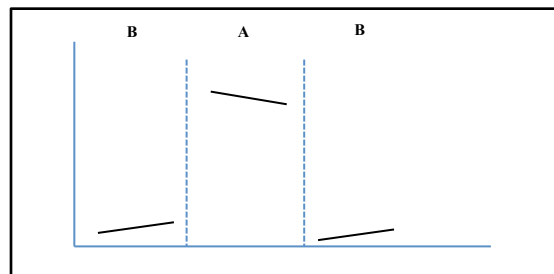

**Moderate Control Examples (cont.):**

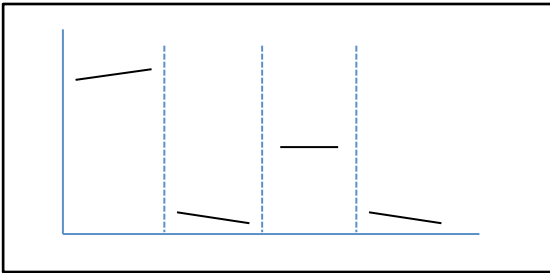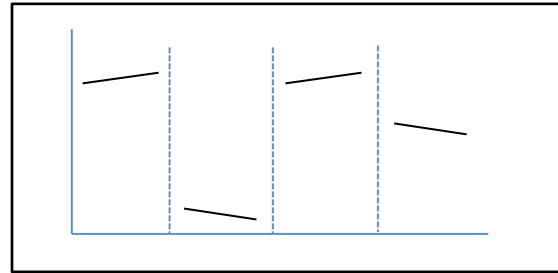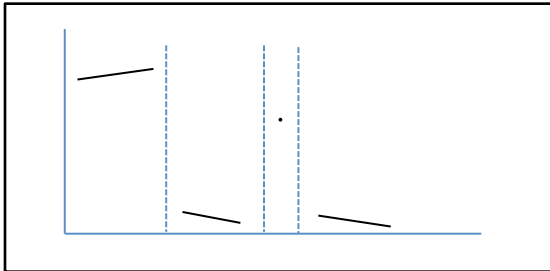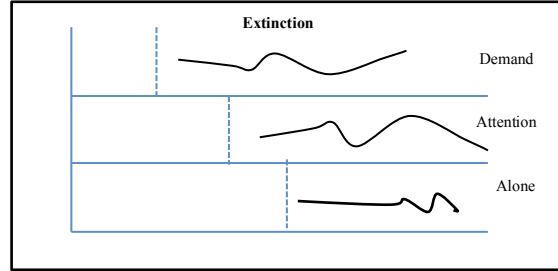

**Weak Control Examples:**

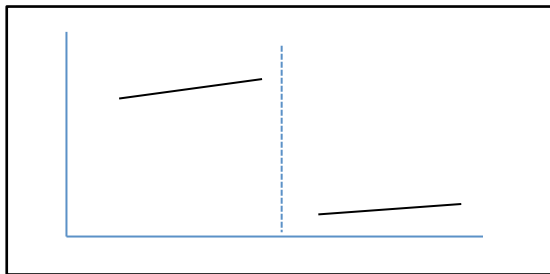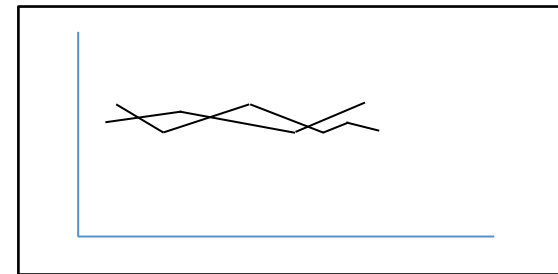

Supplement: NIHMS1681088-supplement-Appendix.pdf [file NIHMS1681088-supplement-Appendix.pdf]
